# Supplementary material for: Chromatin remodeling by the SWI/SNF complex is essential for transcription mediated by the yeast cell wall integrity MAPK pathway
Source: PubMed Central journal article supplement — Mol Biol Cell. 2012 Jul 15;23(14):2805–17. doi: 10.1091/mbc.E12-04-0278 (PMC3395667; doi:10.1091/mbc.e12-04-0278), 2012-07-15
Supplement: supp_E12-04-0278_CombinedSupMats.pdf [file supp_E12-04-0278_CombinedSupMats.pdf]

# Supplemental material

## Figure S1

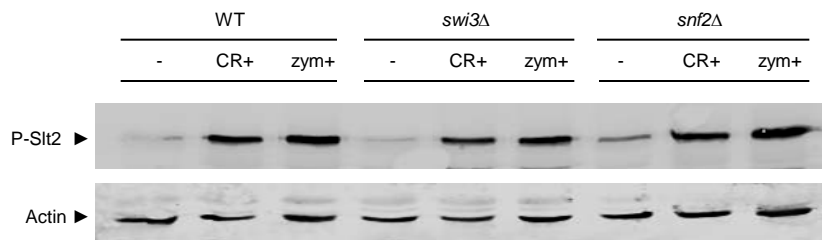

**Figure S1. Phosphorylation of Slt2 under cell wall stress is independent on the SWI/SNF complex.** Slt2 activation was analyzed by western blotting using anti-phospho-p44/42 MAPK Ab (Thr202/Tyr204; Cell Signalling Technology, Beverly, MA) in WT and *swi/snf* mutant cells growing at 24°C to midlog phase and exposed to zymolyase (0.4 U/ml) and CR (30 µg/ml) during 3 h. The protein load was monitored using a mouse anti-actin mAb C4 (ICN Biomedicals, Aurora, OH).

# Supplemental material

## Figure S2

**A**

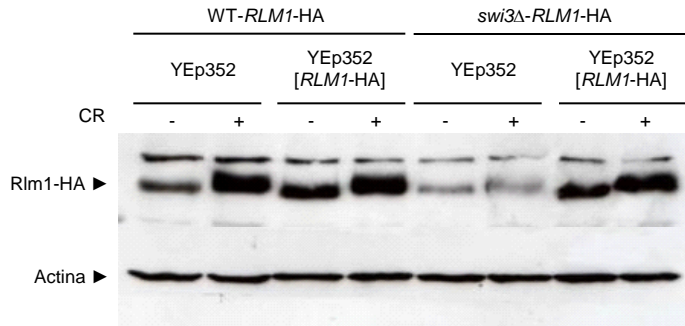

**B**

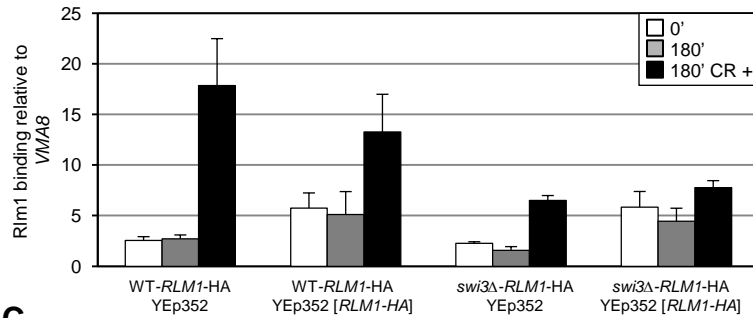

**C**

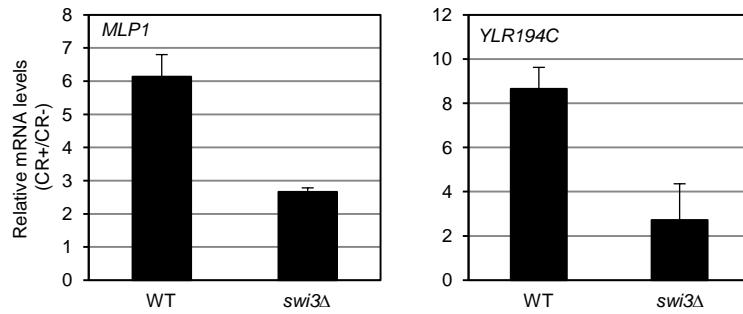

**D**

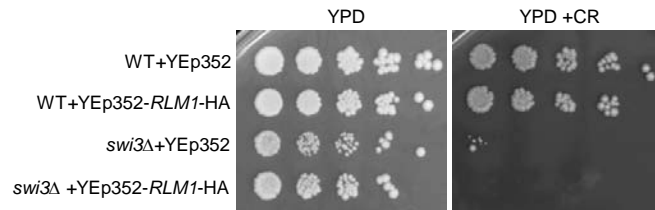

**Figure S2. Rlm1 overexpression does not suppress the defects of a *swi3Δ* mutant.**

(A) Expression of Rlm1-HA from a multicopy plasmid restores levels of Rlm1 similar to those found in a WT strain both under basal and stress conditions. WT and *swi3Δ* strains expressing the Rlm1-HA tagged protein were transformed with YEp352 [*RLM1*-HA] and the corresponding empty vector YEp352. These transformants were grown to mid-log phase and subjected (+) or not (-) to cell wall stress (CR 30 μg/ml, 3 hours). The amount of Rlm1-HA was determined by western blotting using an anti-HA mAb. Protein load was monitored using a mouse anti-actin mAb. (B) Overexpression of Rlm1 does not restore the defect of a *swi3Δ* strain for Rlm1 recruitment at *MLP1* under cell wall stress. Rlm1-HA binding to *MLP1*BOX1 was analyzed by ChIP and normalized to the *VMA8* promoter region in the same cells and conditions described in panel A. (C) Overexpression of Rlm1 in a *swi3Δ* mutant strain does not restore levels of transcriptional induction of CWI-responsive genes of a WT strain under cell wall stress conditions. mRNA levels of *MLP1* and *YLR194C* were analyzed by RT-qPCR in WT and *swi3Δ* cells transformed with YEp352 [*RLM1*-HA] and subjected or not to cell wall stress (CR 30 μg/ml, 3 hours). Levels of mRNA are given relative to the *ACT1* control, representing the ratio between CR-treated and non-treated cells. Data represent the mean and standard deviation of three independent experiments. (D) Overexpression of Rlm1 in a *swi3Δ* mutant does not revert the hypersensitivity of this mutant to cell wall-interfering compounds. WT and *swi3Δ* strains expressing or not Rlm-HA from the multicopy plasmid (YEp352 [*RLM1*-HA]) were spotted on YPD plates without (YPD) and with CR (50 μg/ml) (YPD+CR) and grown for 72 hours at 30°C.

Supplemental material  
Figure S3

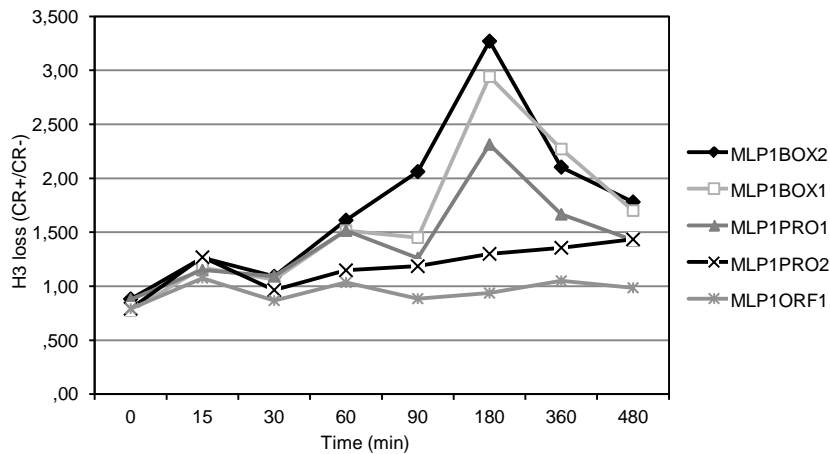

**Fig. S3. Kinetics of H3 displacement at *MLP1* gene.** WT cells grown to mid-log phase were or not subjected to cell wall stress (CR 30  $\mu$ g/ml) and histone H3 binding to different regions of *MLP1* promoter and ORF (see Figure 4A for details) was analyzed by ChIP at the times indicated. Quantitative data were obtained by qPCR using the *VMA8* promoter region as a reference control. Results are shown as the ratio of H3 loss between treated and untreated culture (Note: the displacement [loss] value is an inverse value of abundance).
